# Supplementary material for: A single-dose live attenuated chimeric vaccine candidate against Zika virus
Source: PubMed Central journal article supplement (PMC7846741; doi:10.1038/s41541-021-00282-y), 2021-01-29
Supplement: 41541_2021_282_MOESM1_ESM.pdf [file 41541_2021_282_MOESM1_ESM.pdf]

1 **Supplementary Figures**

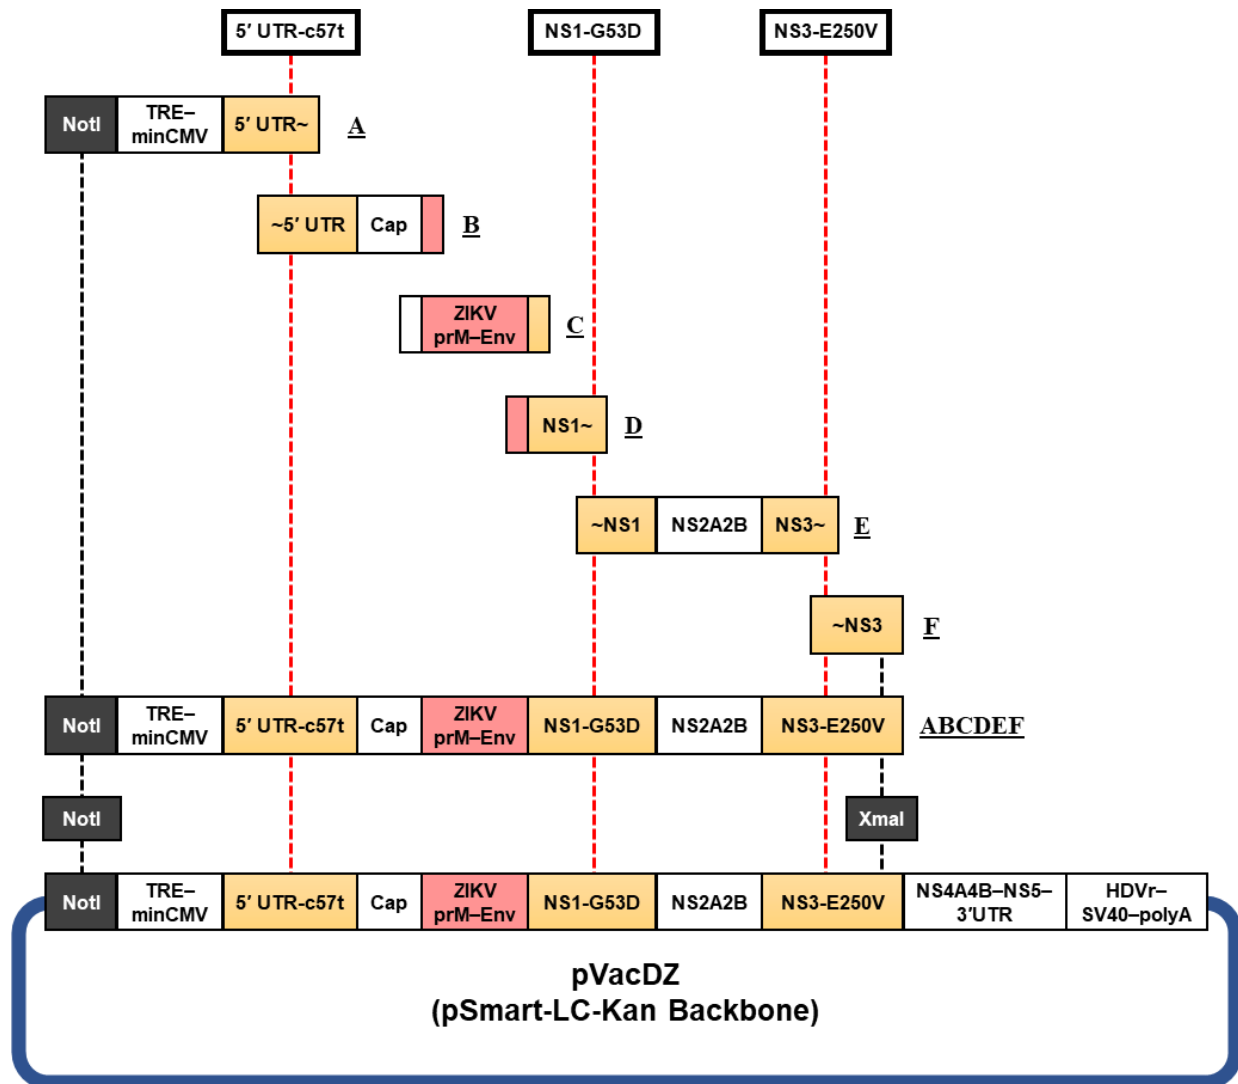

2  
3

4 **Supplementary Figure 1. Construction of chimeric dengue/Zika virus VacDZ infectious**  
 5 **clone.** The infectious clone of VacDZ, called pVacDZ, was constructed using PCR, fusion PCR,  
 6 and conventional molecular cloning techniques. A, B, C, D, E, and F indicate PCR amplicons  
 7 that were amplified using primers, fusion PCR primers, or site-mutagenesis primers (**Table S4**).  
 8 The PCR amplicons were fused by fusion PCR to ultimately form amplicon ABCDEF, which  
 9 was cloned into a DENV2 infectious clone using the NotI and XmaI restriction digestion sites.

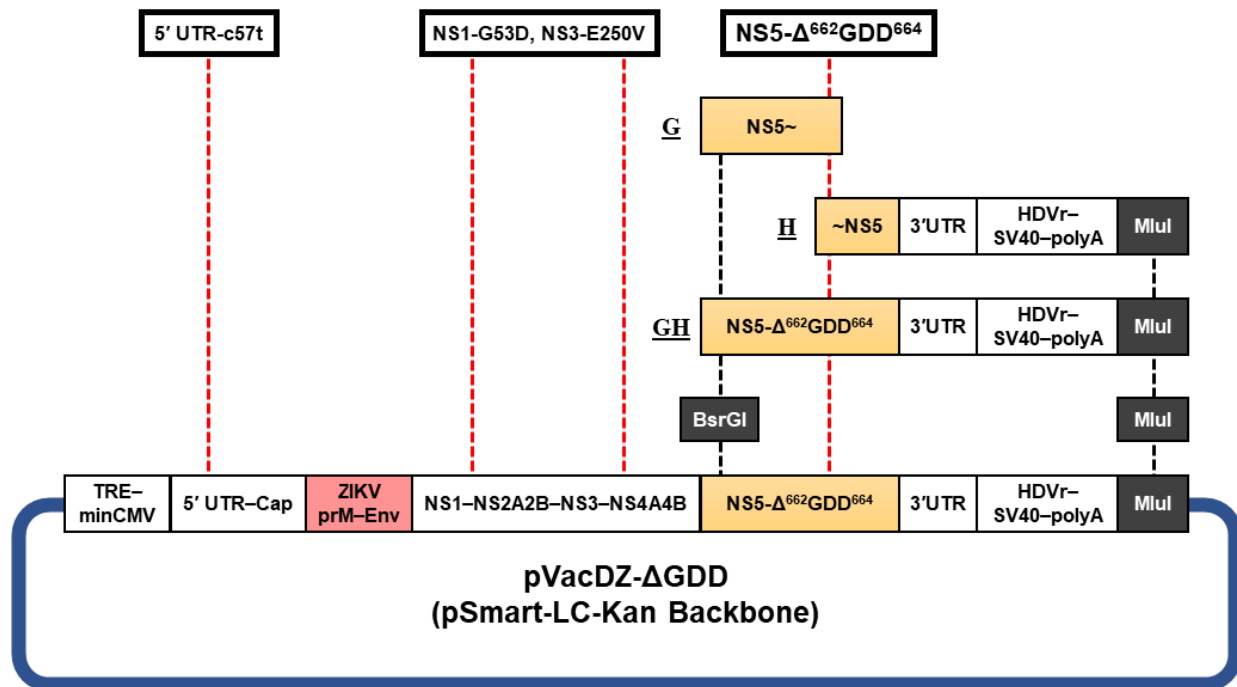

10  
11

12 **Supplementary Figure 2. Construction of NS5 ΔGDD mutant of VacDZ.** The infectious  
 13 clone pVacDZ-ΔGDD with a deletion of the GDD catalytic triad of the NS5 protein RNA-  
 14 dependent RNA polymerase was constructed using PCR, fusion PCR, and conventional  
 15 molecular cloning techniques. G and H indicate PCR amplicons that were amplified using site-  
 16 mutagenesis primers. The PCR amplicons were fused by fusion PCR to form amplicon GH,  
 17 which was cloned into a pVacDZ infectious clone using the BsrGI and MluI restriction digestion  
 18 sites.

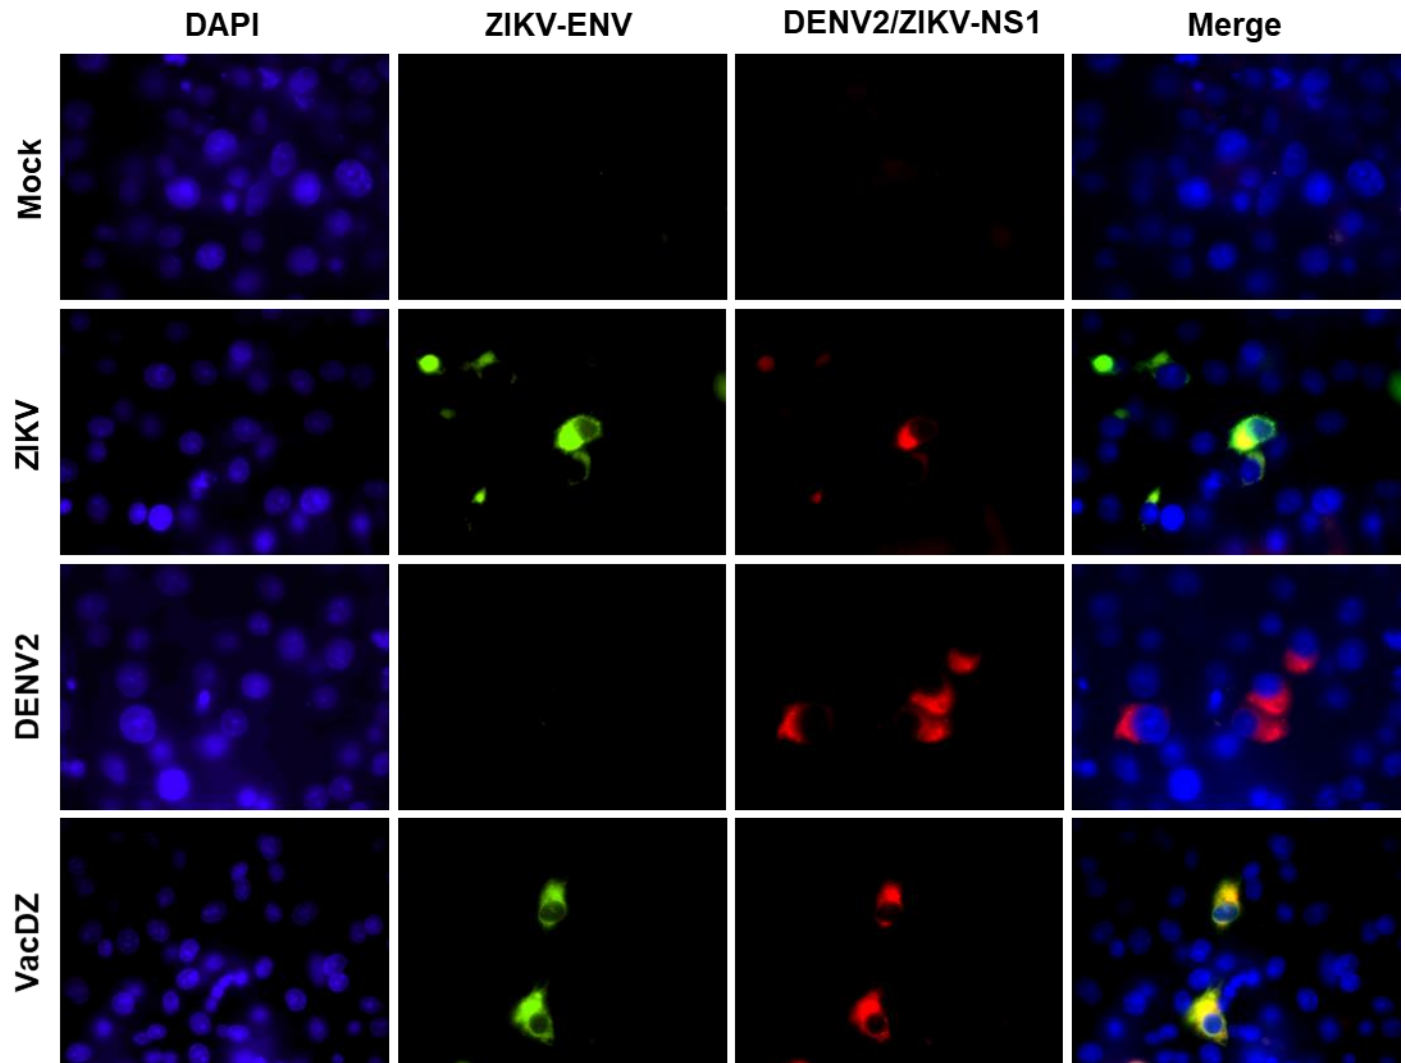

19

20

21 **Supplementary Figure 3. Immunofluorescence assay for ZIKV-Env expression.** BHK-21

22 cells were infected with ZIKV, DENV2-16681, or VacDZ. The cells were fixed and

23 immunofluorescence assay was used to analyse expression of DENV2 or ZIKV NS1 protein

24 (red), or ZIKV envelope protein (green). Host nuclei were stained with DAPI (blue).

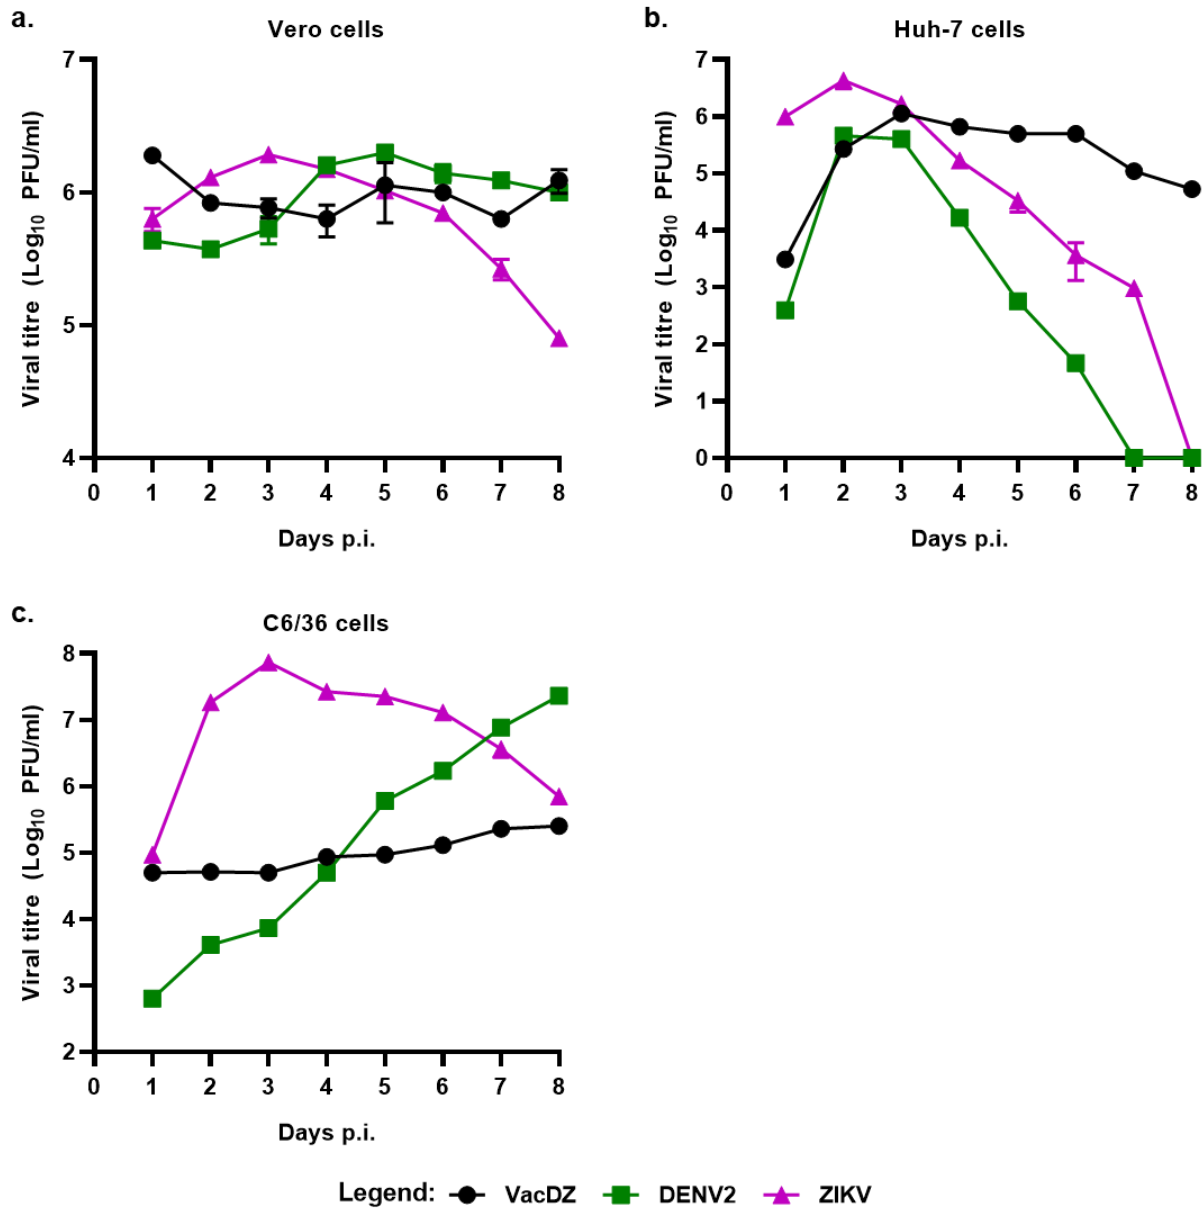

25

26 **Supplementary Figure 4. Virus replication kinetics.** Viral replication kinetics for VacDZ,  
 27 DENV2-16681 and ZIKV in different cell lines. The indicated cell lines were infected with the  
 28 different viruses at an MOI of 1 and the viral titres were analysed by using plaque assay. (a)  
 29 Vero African green monkey kidney cells. (b) Huh-7 human hepatoma cells. (c) C6/36 *Aedes*  
 30 *albopictus* mosquito cells. Data represents the mean of three replicates.

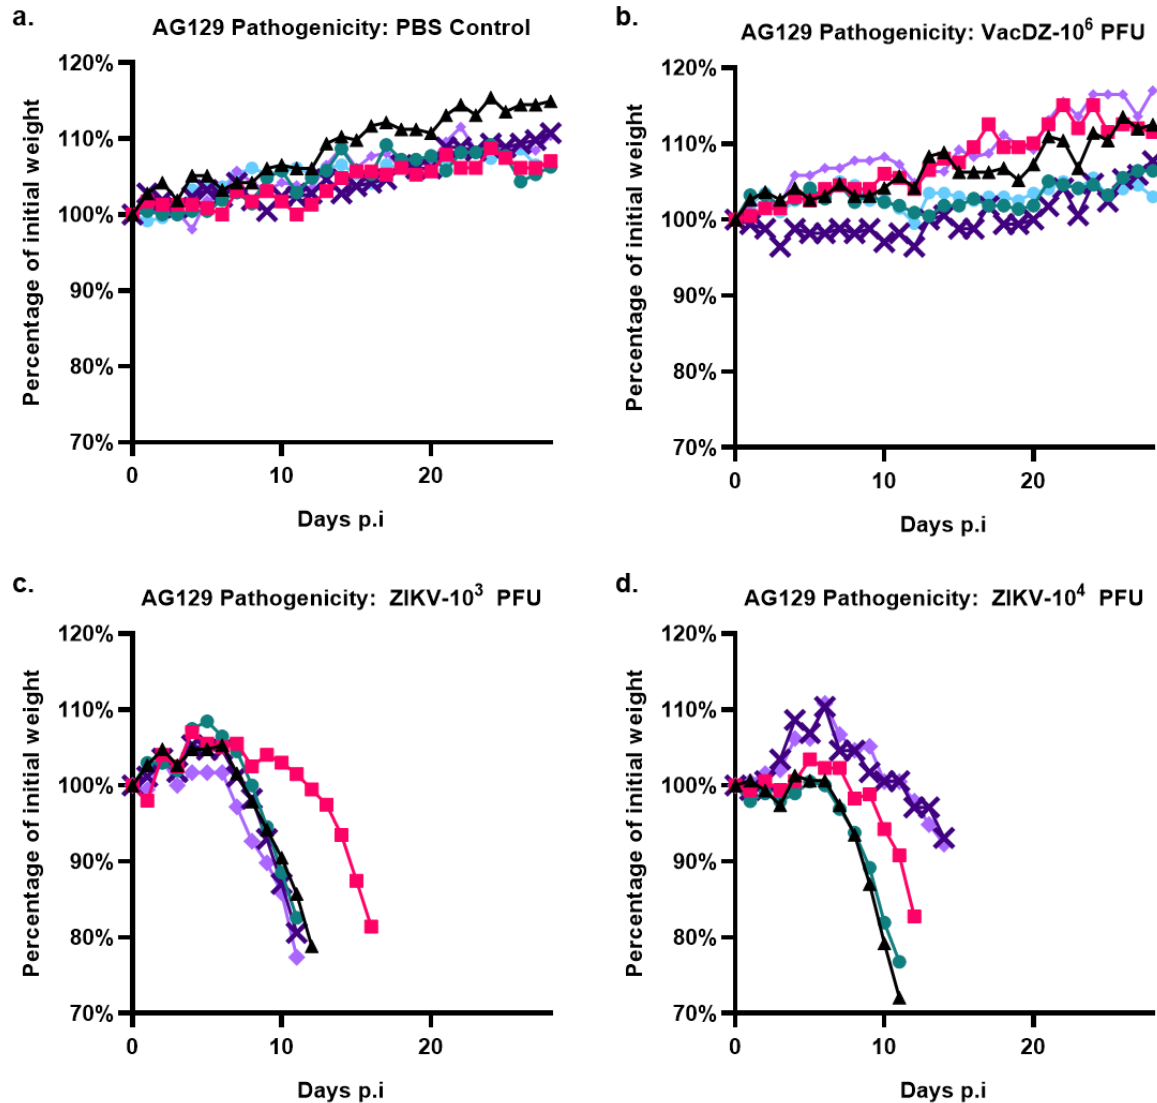

31

32

33 **Supplementary Figure 5. AG129 mouse weights during pathogenicity studies.** 5-8 weeks old

34 AG129 mice were challenged with the indicated doses of VacDZ, ZIKV or PBS control via

35 intraperitoneal inoculation. The mice were kept for four weeks and observed daily for clinical

36 symptoms and euthanised when they reached a humane endpoint. Each line represents one

37 mouse. **(a)** PBS vehicle control group, n=6. **(b)** Live VacDZ, 10<sup>6</sup> PFU per mouse, n=6. **(c)**

38 ZIKV, 10<sup>3</sup> PFU per mouse, n=5. **(d)** ZIKV, 10<sup>4</sup> PFU per mouse, n=5.

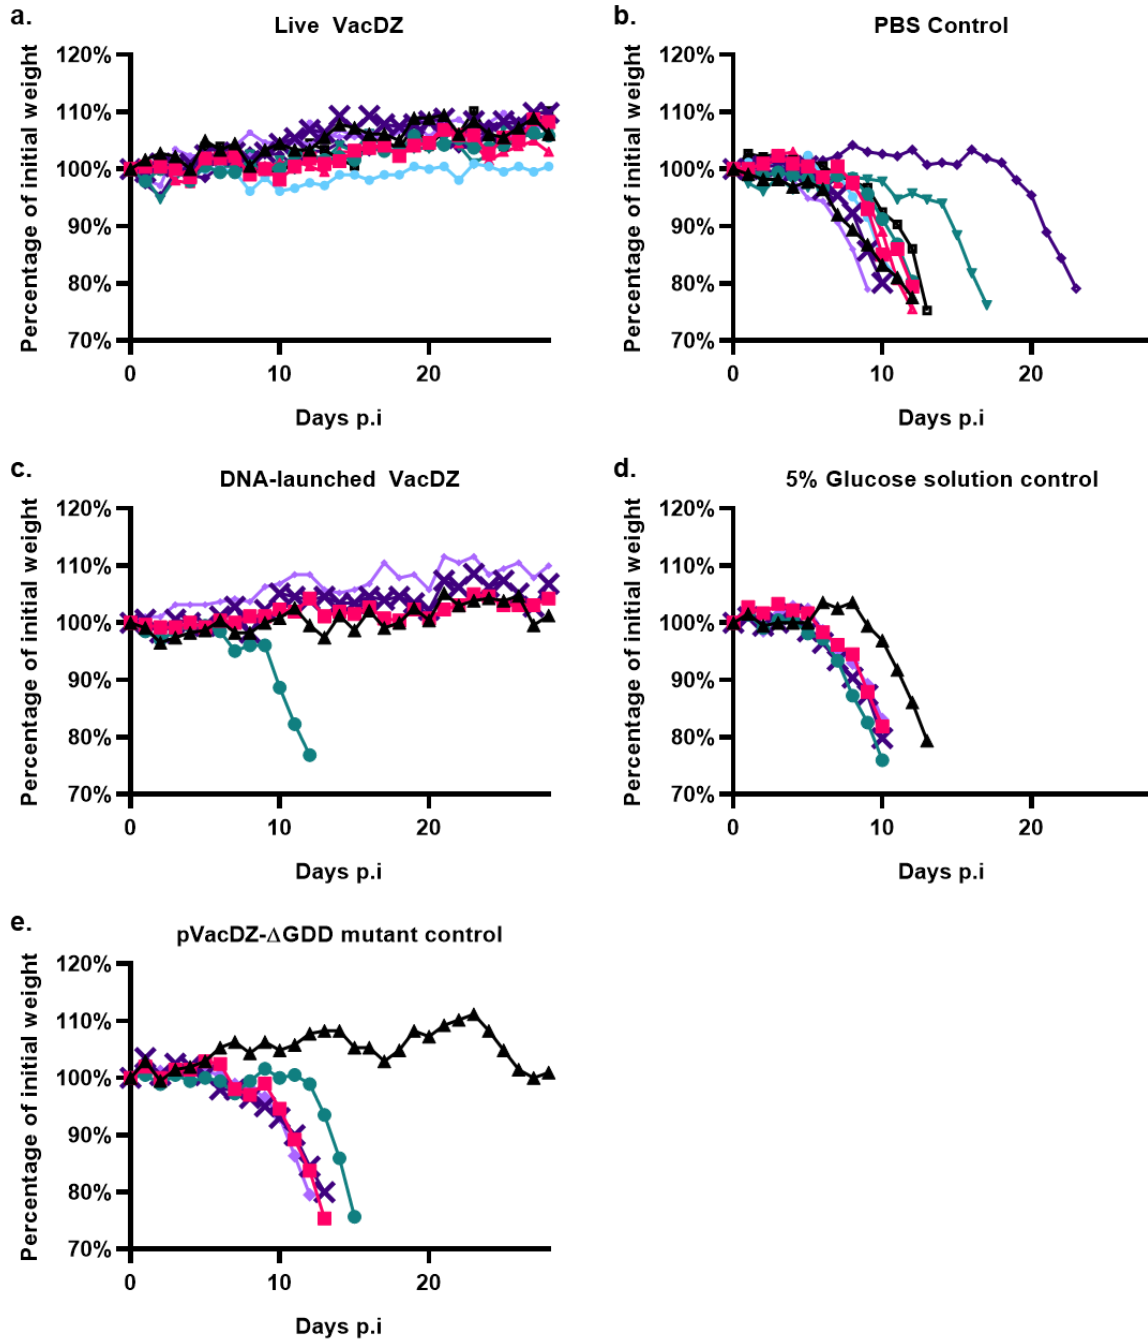

39

40

41 **Supplementary Figure 6. Mouse weights for protective immunity studies in AG129 mice.** 5-

42 8 weeks old AG129 mice were inoculated intraperitoneally with the indicated vaccine or control.

43 Four weeks after vaccination they were challenged with a lethal dose of  $10^5$  PFU of ZIKV per

44 mouse. The mice were kept for four weeks and observed daily for clinical symptoms and  
45 euthanised when they reached a humane endpoint. Each line represents one mouse. Vaccination  
46 doses: **(a)** VacDZ (10,000 PFU per mouse, n=11). **(b)** PBS vehicle control (n=10). **(c)** DNA-  
47 launched VacDZ (80 µg of pVacDZ and 20 µg of pTet-Off Advanced per mouse, n=5). **(d)** 5%  
48 glucose solution vehicle control (n=5). **(e)** pVacDZ-ΔGDD replication defective mutant (80 µg  
49 of pVacDZ-ΔGDD and 20 µg of pTet-Off Advanced per mouse, n=5).

50 **Supplementary Tables**

| Attenuation Loci | Nucleotide Position | VacDZ Nucleotide | Wildtype Nucleotide | Change | Reversion Rate |
|------------------|---------------------|------------------|---------------------|--------|----------------|
| DV2-5'UTR        | 5'UTR-57            | T                | C                   | T -> C | <1%            |
| DV2-NS1          | NS1-158             | A                | G                   | A -> G | <1%            |
| DV2-NS3          | NS3-749             | T                | A                   | T -> A | <1%            |

51

52 **Supplementary Table 1.** Reversion rate of key attenuating mutations of VacDZ. VacDZ was  
 53 serially passaged in BHK-21 cells. At passage 10 viral RNA was extracted and the reversion rates  
 54 of the attenuating mutations were analysed by using next-generation sequencing.



| Virus       | Dose<br>(PFU per mouse) | Number of mice<br>Surviving/Total | Mortality Rate |
|-------------|-------------------------|-----------------------------------|----------------|
| VacDZ       | 1                       | 11/11                             | 0%             |
| VacDZ       | 10                      | 11/11                             | 0%             |
| VacDZ       | 100                     | 11/11                             | 0%             |
| DENV2-16681 | 10                      | 4/12                              | 66.7%          |
| DENV2-16681 | 100                     | 3/12                              | 75%            |
| ZIKV        | 1                       | 2/10                              | 80%            |
| ZIKV        | 10                      | 0/7                               | 100%           |
| ZIKV        | 100                     | 0/14                              | 100%           |
| PBS control | NA                      | 6/6                               | 0%             |

55

56 **Supplementary Table 2.** Details of neurovirulence study in suckling mice. Newborn mice were

57 challenged with the indicated doses of VacDZ, DENV2-16681, or ZIKV via intracranial

58 inoculation.

| Vaccination Agent           | No. of Mice | Seroconversion Rate | PRNT Titre Geometric Mean |
|-----------------------------|-------------|---------------------|---------------------------|
| Live VacDZ                  | 8           | 100%                | 1:3044.37                 |
| PBS control                 | 6           | 0%                  | ND                        |
| DNA-launched VacDZ          | 5           | 100%                | 1:1114.3                  |
| 5% Glucose solution control | 5           | 0%                  | ND                        |
| pVacDZ-ΔGDD control         | 4           | 0%                  | ND                        |

59

60 **Supplementary Table 3.** Seroconversion and neutralisation titres of vaccinated mice. AG129

61 mice were vaccinated and boosted four weeks apart with live VacDZ, DNA-launched VacDZ or

62 their respective controls. Four weeks after boosting, mouse serum was harvested and induction of

63 neutralising antibodies against ZIKV was analysed using PRNT. ND: non-detected, titres were

64 below the detection limit of the PRNT.

| Vaccination Agent   | No. of Mice | Survival Rate | Seroconversion Rate (surviving mice) | PRNT Titre Geometric Mean |
|---------------------|-------------|---------------|--------------------------------------|---------------------------|
| Live VacDZ          | 11          | 100%          | 100%                                 | 1:3044.37                 |
| PBS control         | 10          | 0%            | NA                                   | NA                        |
| DNA-launched VacDZ  | 5           | 80%           | 100%                                 | 1:1114.3                  |
| pVacDZ-ΔGDD control | 5           | 20%           | 100%                                 | 1:10240                   |
| 5% Glucose control  | 5           | 0%            | NA                                   | NA                        |

65

66 **Supplementary Table 4.** Survival rate, seroconversion and neutralisation titres of vaccinated

67 mice. AG129 mice were vaccinated with live VacDZ, DNA-launched VacDZ or their respective

68 controls and then challenged four weeks later with a lethal dose of ZIKV ( $10^5$  PFU per mouse).

69 Four weeks after lethal challenge, mouse serum was harvested from the surviving mice and

70 induction of neutralising antibodies against ZIKV was analysed by using plaque reduction

71 neutralisation test. NA: not applicable, there were no surviving mice to perform PRNT.

| Amplicon | Corresponding region                                  | PCR primers                                                                    |
|----------|-------------------------------------------------------|--------------------------------------------------------------------------------|
| A        | NotI site–TRE–CMVmin–<br>5'UTR~                       | 5': CAGTCCAGTTACGCTGGAGTC<br>3': GTTAGAACTACATTGAGCTTAGCTCCCTCAAAG             |
| B        | ~5'UTR–Cap–prM signal<br>sequence                     | 5': GCTAAGCTCAATGTAGTTCTAACAGTTTTTTAATTAG<br>3': CGACACTAGTGCCTGCAGATCTGCGTCTC |
| C        | ZIKV: prM signal sequence–<br>prM–Env                 | 5': GATCTGCAGGCACTAGTGTCGGAATTGTTGGC<br>3': GCAACCACTATCAGCAGAGACGGCTGTGGA     |
| D        | NS1~                                                  | 5': GTCTCTGCTGATAGTGGTTGCGTTGTGAGCT<br>3': TCCACAAATGtCCTCTTCATGGGCTTTCTG      |
| E        | ~NS1–NS2A–NS3~                                        | 5': CATGAAGAGGacATTTGTGGAATCCGCTCA<br>3': CCCGGTGTGCACAGCTCTGATGGCTGGGGTC      |
| F        | ~NS3                                                  | 5': ATCAGAGCTGTGCACACCGGGCGGGAGATTGT<br>3': CTTTCTTCCGGCTGCAAATTCC             |
| ABC      | NotI–TRE–CMVmin–5'UTR–<br>NS1~                        | 5': CAGTCCAGTTACGCTGGAGTC<br>3': GCAACCACTATCAGCAGAGACGGCTGTGGA                |
| DEF      | ~NS1–NS3                                              | 5': GTCTCTGCTGATAGTGGTTGCGTTGTGAGCT<br>3': CTTTCTTCCGGCTGCAAATTCC              |
| ABCDEF   | NotI–TRE–CMVmin–5'UTR–<br>NS1–NS3                     | 5': CAGTCCAGTTACGCTGGAGTC<br>3': CTTTCTTCCGGCTGCAAATTCC                        |
| G        | NS5~                                                  | 5': GGAAGTGGCAACATAGGAGAGA<br>3': GTTTCACAACACAACACTGATGGCCATTCTTGATAACC       |
| H        | ~NS5–3'UTR–HDV <sub>r</sub> –SV40–<br>polyA–MluI site | 5': GGCCATCAGTTGTGTTGTGAAACCTTTAGATGAC<br>3': GGTCAGGTATGATTTAAATGGTCAGT       |
| GH       | NS5–3'UTR–HDV <sub>r</sub> –SV40–<br>polyA–MluI site  | 5': GGAAGTGGCAACATAGGAGAGA<br>3': GGTCAGGTATGATTTAAATGGTCAGT                   |

73 **Supplementary Table 5.** Primer sequences for PCR. NS1~, ~NS1, ~NS3... etc indicates partial  
74 fragment of the indicated coding region.

75

| Score       | 1                                                                                                      | 2                                                                                                                                                                                 | 3                                                                                                                                     |
|-------------|--------------------------------------------------------------------------------------------------------|-----------------------------------------------------------------------------------------------------------------------------------------------------------------------------------|---------------------------------------------------------------------------------------------------------------------------------------|
| Activity    | <u>1a</u><br>Abnormal posture (e.g. hunched), lethargy.                                                | <u>2a</u><br>Inactive, overactive, huddled.                                                                                                                                       | <u>3a</u><br>Moribund, seizure (no movement, uncontrollable behaviour).                                                               |
| Movement    | <u>1b</u><br>Slight incoordination, (Appears to limp while walking, wobbling but doesn't really drop). | <u>2b</u><br>1 limb paralysis, slight tremor, unsteady gait (wobbling and falling while trying to walk), severe limp, lower pelvis close to ground, feet pointing away from body. | <u>3b</u><br>2 limb paralysis, severe tremor, severe ataxia, cannot roll over, difficulty moving forward, dragging abdomen on ground. |
| Breathing   | <u>1c</u><br>Rapid shallow.                                                                            | <u>2c</u><br>Rapid abdominal.                                                                                                                                                     | <u>3c</u><br>Laboured, blue.                                                                                                          |
| Body Weight | <u>1d</u><br>5% decrease over 24h                                                                      | <u>2d</u><br>10% decrease over 24h, or cumulative weight loss >15%.                                                                                                               | <u>3d</u><br>Weight loss >10% over 24h, or cumulative weight loss >20%.                                                               |

76

77 **Supplementary Table 6.** Clinical scoring methodology. For mouse pups, the humane endpoint  
78 is reached when the pup reaches a cumulative score of 3 (e.g activity, movement, and breathing  
79 scores of 1 + 1 + 1). For adult mice, humane endpoint is reached when any individual category  
80 reaches a score of 3 (e.g activity = 3, or movement = 3), or when the mouse reaches a cumulative  
81 score of 6.
